# Supplementary material for: Porous TiNi3-based intermetallics as active and robust monolith catalysts for hydrogen evolution
Source: Royal Society of Chemistry journal article supplement (doi:10.1039/d2cc05574k), 2022-01-01
Supplement: d2cc05574k1.pdf [file d2cc05574k1.pdf]

## *Supporting information for*

# **Porous TiNi<sub>3</sub>-based Intermetallics as Active and Robust Monolith Catalysts for Hydrogen Evolution**

Yue Qiu, Zhenli He, Yuehui He, Qian Zhao, Zhonghe Wang, and Yao Jiang\*

*State Key Laboratory of Powder Metallurgy, Powder Metallurgy Research Institute, Central South University,*

*Changsha 410083, Hunan, China.*

\*To whom correspondence should be addressed.

E-mail: jiangyao@csu.edu.cn.

### **Experimental section:**

**Chemicals:** Ti powders ( $D_{50} = 28.7 \mu\text{m}$ , 99.9%), Ni powders ( $D_{50} = 33.1 \mu\text{m}$ , 99.9%), and Mo powders ( $D_{50} = 9.88 \mu\text{m}$ , 99.9%) were purchased from Beijing Xingrongyuan Technology Co. Ltd (Figure S13, ESI†). Nafion solution (~5 wt% in a mixture of lower aliphatic alcohols and water) was purchased from Sigma-Aldich. The commercial Pt/C (20 wt% loading) was purchased from Johnson Matthey (JM). Isopropanol ( $\text{C}_3\text{H}_8\text{O}$ , >99.7%) was purchased from Sinopharm Chemical Reagent Co. Ltd. (Shanghai, China). The water (18 M $\Omega$ /cm) used in all experiments was prepared by passing through an ultra-pure purification system (Aqua Solution).

**Synthesis of TiNi<sub>3</sub> Monolith Catalyst.** First, Ti powders and Ni powders were mechanically mixed for 48 h at an atomic ratio of 1:3. Then the mixed powders were loaded into a sintering boat of size 15 × 76 × 11 mm and loose-powder sintering. The whole sintering process consisted of six stages: 120°C holding 0.5 h, 600°C holding 10 min, 750°C holding 1.5 h, 900°C holding 2 h, 1100°C holding 2 h, and 1300°C holding 6 h. Finally, the sample cooled to room temperature, and the TiNi<sub>3</sub> porous monolith catalyst (PMC) was obtained.

**Synthesis of Mo-TiNi<sub>3</sub> Monolith Catalyst.** The synthesis method of Mo-TiNi<sub>3</sub> was the same as that of TiNi<sub>3</sub>, except that Mo powders were used. Mo powders of different contents 2, 8, and 10 % were mixed well with Ti powders and Ni powders (denote as

Mo-TiNi<sub>3</sub>-2%, Mo-TiNi<sub>3</sub>-8%, and Mo-TiNi<sub>3</sub>-10%, respectively), and then synthesised by the above methods.

**Synthesis of TiNi<sub>3</sub>/Mo(10%) physical mixture powders catalyst.** TiNi<sub>3</sub> was ground to a 30 μm powders. 84.006 mg TiNi<sub>3</sub> powders and 15.996 mg Mo powders were taken and dispersed in 720 μL water, 240 μL isopropanol and 40 μL Nafion (5 wt%) solution. The mixture was then sonicated for 30 minutes to form a homogeneous ink. Finally, the catalyst ink was loaded onto the Ni Foam substrate to give a mass loading of approximately 20 mg cm<sup>2</sup> and dried naturally for electrochemical tests.

**Synthesis of Mo-TiNi<sub>3</sub>-10% doped powders catalyst.** Mo-TiNi<sub>3</sub>-10% was ground to a 30 μm powders, 100 mg of Mo-TiNi<sub>3</sub>-10% powders were loaded onto nickel foam in the same way for electrochemical testing.

**Material characterization.** The phase of porous materials was measured by X-ray diffractometer (RigakuD/Max2500). The X-ray source was Cu Kα ( $\lambda = 0.154056$  nm). The grazing incidence XRD data are recorded by the Rigaku Smartlab instrument, and the grazing incidence angle is 0.1 °. The morphology of porous materials was analyzed by field emission scanning electron microscope (MIRA 3). X-ray photoelectron spectroscopy (ESCALABSB250 Xi) was used to analyze the valence of elements. The X-ray source was Al Kα and the scanning step was 0.05eV. The pore size distribution of porous materials is tested by the Automatic mercury porosimeter (AutoPore IV 9500). The specific surface area of porous materials is measured by the Automatic surface area and porosity analyzer (ASAP2460).

**Electrochemical Measurements.** The HER test was performed on a CHI660D workstation under room temperature and atmospheric pressure. A typical three-electrode system was used to conduct electrochemical measurements under alkaline condition (1 M KOH), with a working electrode, a saturated calomel electrode (SCE) as the reference electrode, and a graphite carbon rod as the counter electrode. The TiNi<sub>3</sub>-based PMCs were used as the working electrode with an electrode area of 1 cm<sup>2</sup>, and commercial Pt/C (20 wt% Pt) was used as comparison. The commercial Pt/C ink was

prepared by dissolving 2 mg commercially available Pt/C in 400  $\mu\text{L}$  isopropanol along with 10  $\mu\text{L}$  Nafion sonicated for 10 min. 10  $\mu\text{L}$  ink was dropped on the glassy carbon electrode (GCE) for electrochemical tests. The electrode to be tested was polarized at constant current under 10  $\text{mA cm}^{-2}$  current density for 6 h to achieve the best performance before testing. According to the relationship between the potential in the Nernst equation and the saturated calomel electrode, the saturated calomel electrode potential is transformed into a pair of reversible hydrogen electrode potential.

$$E_{RHE} = E_{SCE} + E_{REF} + 0.059pH - iR_s \quad (1)$$

Where  $E_{RHE}$  is the potential of the reversible hydrogen electrode after conversion,  $E_{SCE}$  is the measured potential,  $E_{REF}$  is the electrode potential of calomel electrode in saturated KCl solution,  $i$  is the measured current, and  $R_s$  is the uncompensated resistance.

The linear sweep voltammetry (LSV) curves were obtained at a scan rate of 1  $\text{mV s}^{-1}$ , the  $iR$  compensation percentage was 90%. The frequency range of Electrochemical Impedance Spectroscopy (EIS) test was  $10^{-2}$ – $10^5$  Hz with an amplitude of 5 mV. Cyclic voltammetry (CV) curves were carried out at different scanning rates (60, 70, 80, 90, and 100  $\text{mV s}^{-1}$ ) in the non-Faradic region. The electrochemical active surface area (ECSA) is estimated according to the double-layer capacitance.

**Computational methods.** Our calculations were performed by means of density functional theory (DFT) using the Vienna Ab-initio Simulation Package (VASP).<sup>1-3</sup> The electron-ion interactions were described by using projector augmented wave (PAW) method.<sup>4</sup> The cutoff energy for the plane wave-basis expansion was set to 400 eV. The convergence criterion of electronic structure was set to  $10^{-4}$  eV, and the atomic relaxation was continued until the forces acting on atoms were smaller than 0.02 eV/Å. The Brillouin zone was sampled with  $3 \times 4 \times 1$  Monkhorst-Pack k-point mesh, and a Gaussian smearing of 0.05 eV was applied to speed up electronic convergence. The 4-layer  $2\sqrt{2} \times \sqrt{2}$  supercell of  $\text{TiNi}_3$  (004) was used to build the calculation models, and an additional vacuum layer of 20 Å was added to the model to avoid the artificial interaction effect between the slab and their mirror images. A surface Ti or Ni atom was replaced with Mo atom to build the Mo- $\text{TiNi}_3$  (Ti site) and Mo- $\text{TiNi}_3$  (Ni site)

models. In the structure optimization, the bottom 2-layer atoms were fixed, and the other atoms were fully relaxed. The final structure was illustrated with VESTA software.<sup>5</sup>

The hydrogen adsorption free energy was calculated by

$$\Delta G_H = E(*H) - E(*) - 1/2E(H_2) + 0.24 \quad (2)$$

where  $E(*H)$  and  $E(*)$  were the total energies of the TiNi<sub>3</sub> based PMC surface with and without hydrogen adsorption,  $E(H_2)$  was the total energy of hydrogen molecule in vacuum. Besides, an empirical 0.24 eV parameter was chosen to evaluate the zero-point energy and entropy contribution as our previous work.<sup>6</sup>

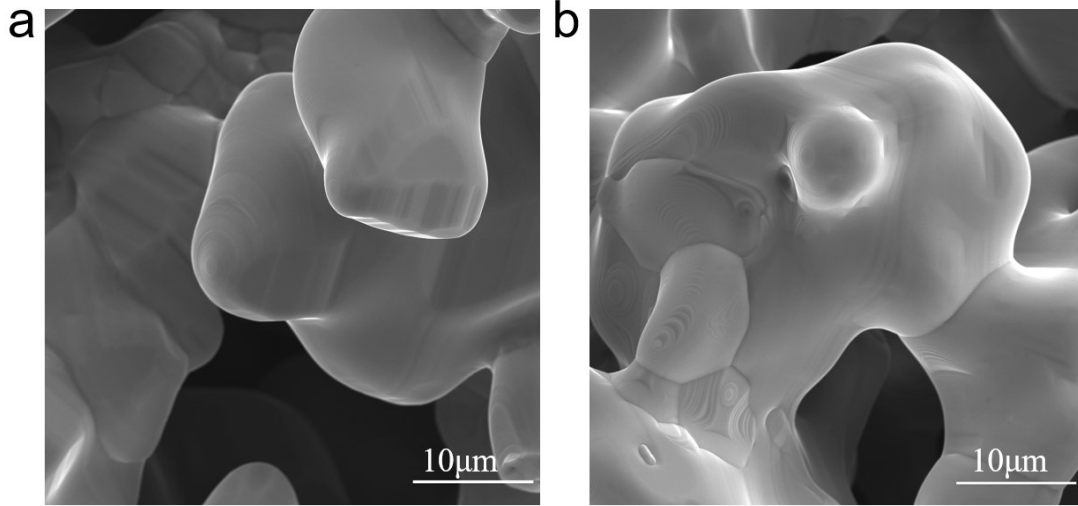

**Fig. S1.** SEM images. a) Mo-TiNi<sub>3</sub>-2%. b) Mo-TiNi<sub>3</sub>-8%.

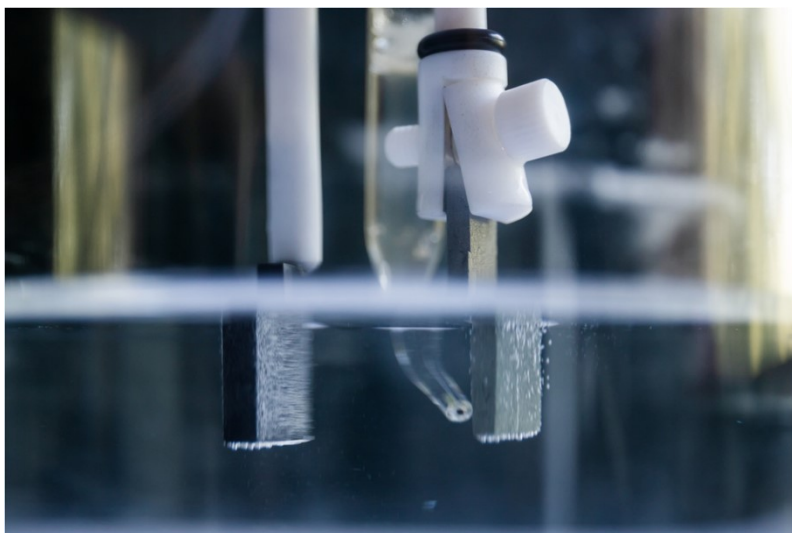

**Fig. S2.** Photo image of the gas bubble.

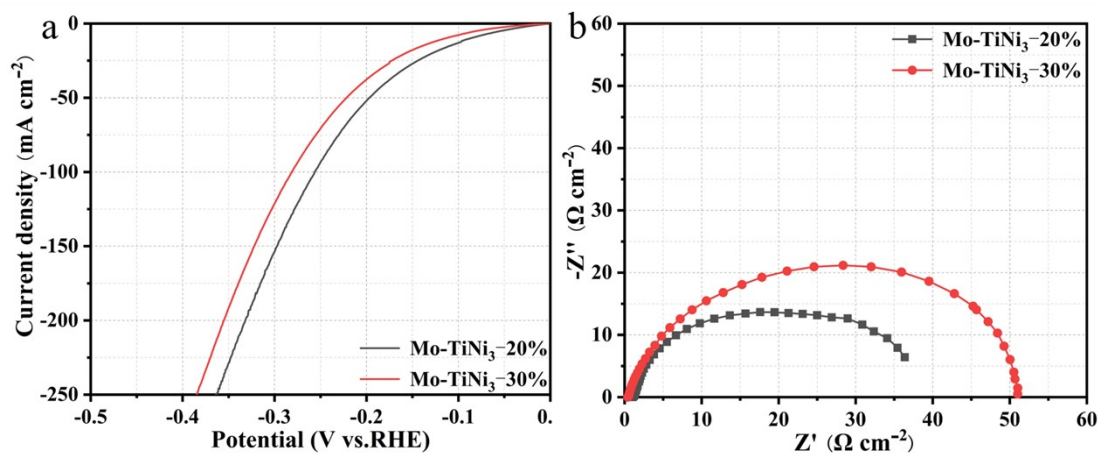

**Fig. S3.** HER performance of the Mo-TiNi<sub>3</sub>-20% and Mo-TiNi<sub>3</sub>-30%. (a) LSV curves. (b) EIS curves.

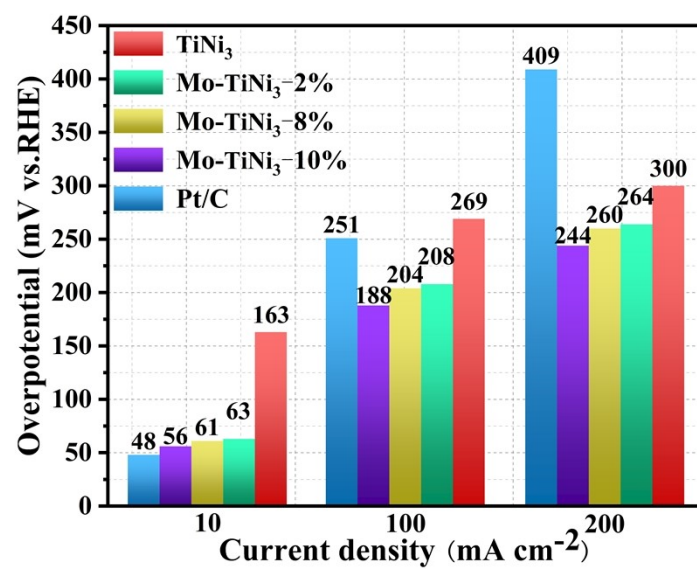

**Fig. S4.** The overpotential of PMCs at different current densities.

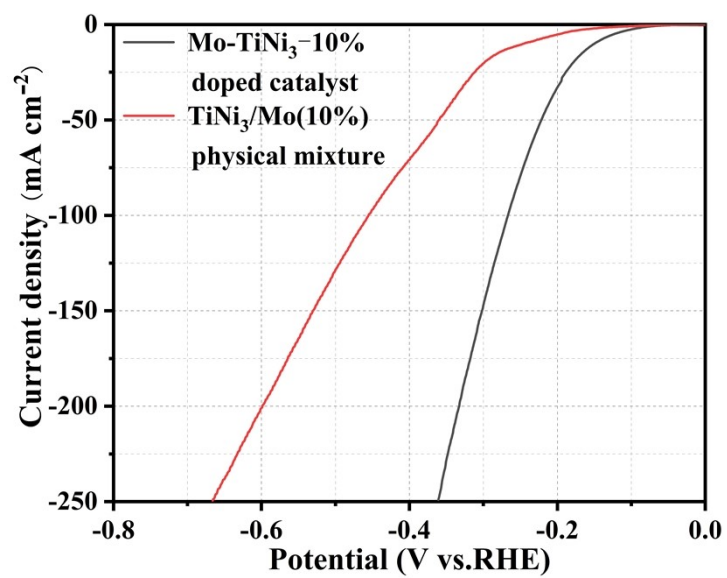

**Fig. S5.** LSV curves of Mo-TiNi<sub>3</sub>-10% (doped catalyst) and TiNi<sub>3</sub>/Mo (10%) (physical mixture) powders.



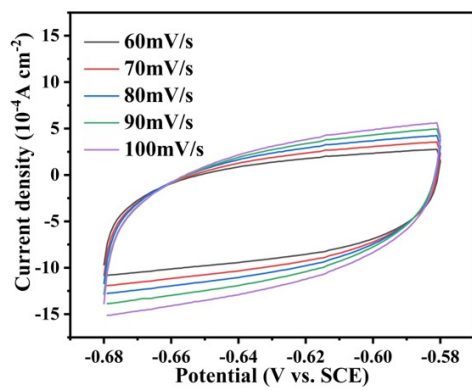

**Fig. S6.** CV curves of TiNi<sub>3</sub>.

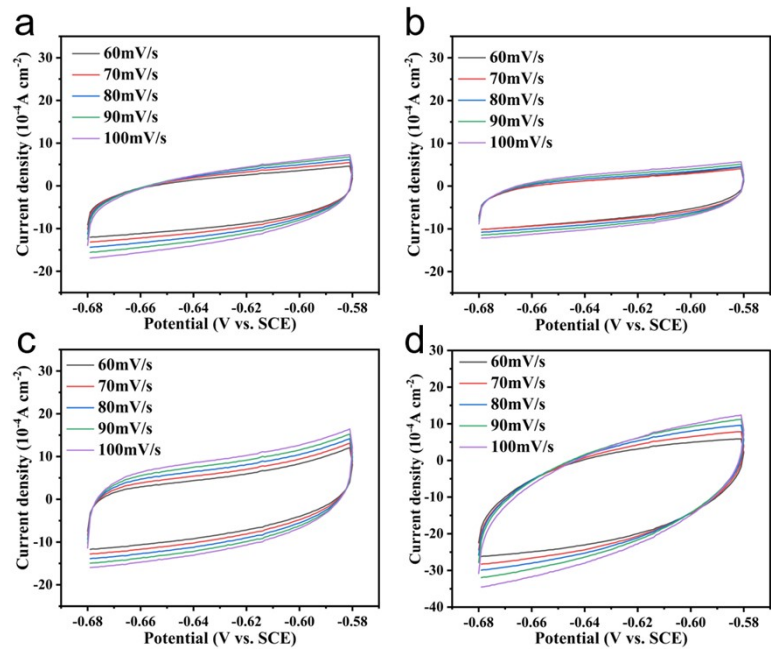

**Fig. S7.** CV curves. a) Mo-TiNi<sub>3</sub>-2%. b) Mo-TiNi<sub>3</sub>-8%. c) Mo-TiNi<sub>3</sub>-10%. d) Pt/C.

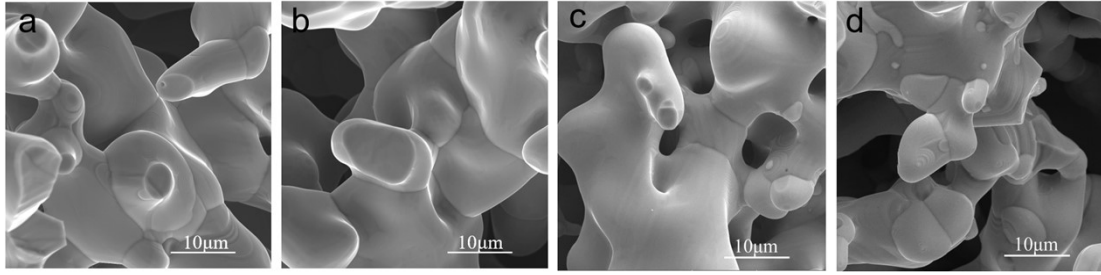

**Fig. S8.** SEM images of  $\text{TiNi}_3$  and  $\text{Mo-TiNi}_3$ -10% PMC (a-b)  $\text{TiNi}_3$  PMC before and after 48 h stability test. (c-d)  $\text{Mo-TiNi}_3$ -10% PMC before and after 48 h stability test.

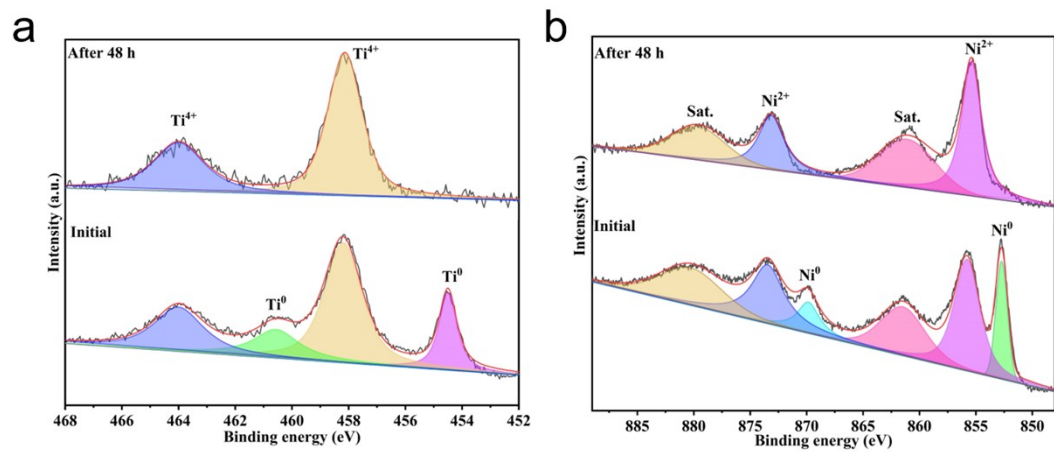

**Fig. S9.** XPS spectrum of  $\text{TiNi}_3$ . a) Ti 2p. b) Ni 2p.

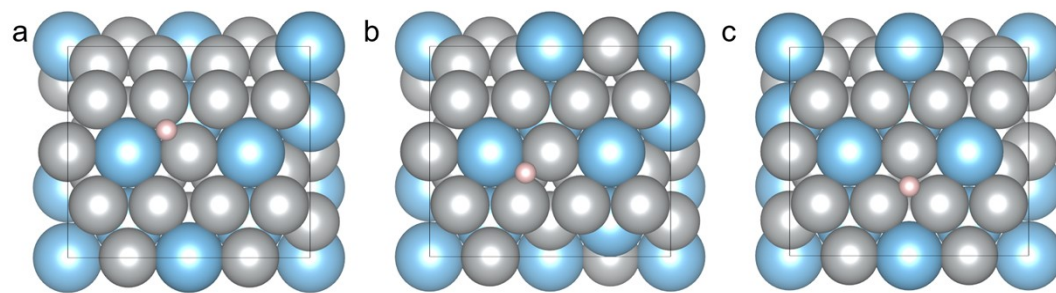

**Fig. S10.** Theoretical adsorption models. a) TiNi<sub>3</sub> (1 site). b) TiNi<sub>3</sub> (2 site). c) TiNi<sub>3</sub> (3 site).

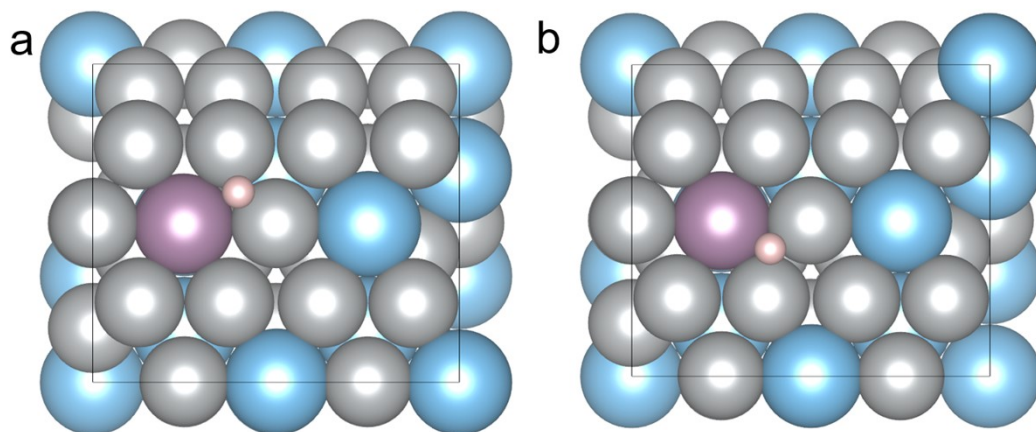

**Fig. S11.** Theoretical adsorption models. a) Mo- $\text{TiNi}_3$  (Ti 1 site). b)  $\text{TiNi}_3$  (Ti 2 site).

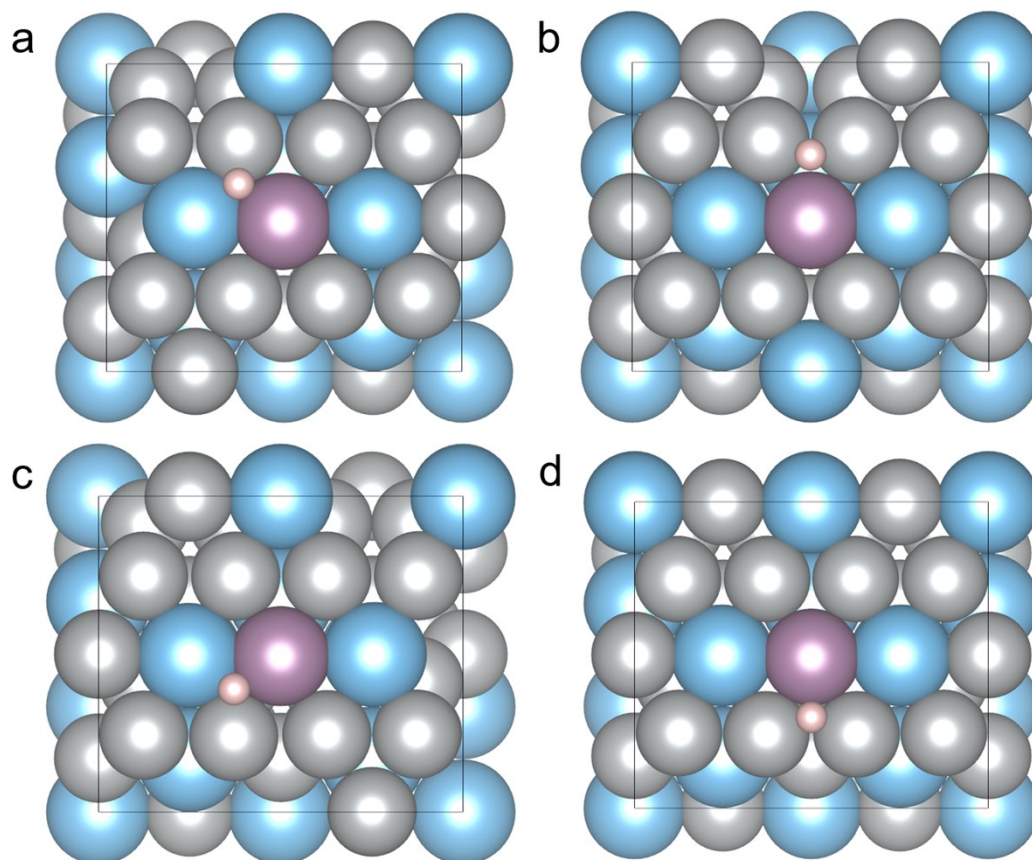

**Fig. S12** Theoretical adsorption models. a) Mo-TiNi<sub>3</sub> (Ni 1 site). b) TiNi<sub>3</sub> (Ni 2 site). c) TiNi<sub>3</sub> (Ni 3 site). d) TiNi<sub>3</sub> (Ni 4 site).

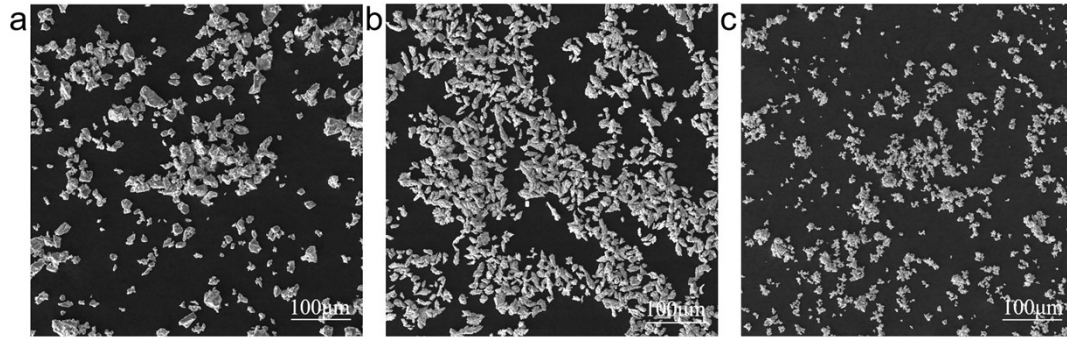

**Fig. S13.** SEM images of powders. a) Ti powders. b) Ni powders. c) Mo powders.



**Table S1.** HER activities of the reported electrocatalysts in 1 M KOH.

| Electrocatalysts                                                                     | Overpotential at<br>10 mA cm <sup>-2</sup><br>(mV) | Tafel slope<br>(mV dec <sup>-1</sup> ) | Ref.      |
|--------------------------------------------------------------------------------------|----------------------------------------------------|----------------------------------------|-----------|
| Mo-TiNi <sub>3</sub> -10%                                                            | 51                                                 | 56                                     | This work |
| Ni <sub>5</sub> P <sub>4</sub> -Ru/CC                                                | 54                                                 | 52                                     | 7         |
| Ni@Ni <sub>2</sub> PRu                                                               | 43                                                 | 41                                     | 8         |
| R-NiRu                                                                               | 16                                                 | 40                                     | 9         |
| NiMoN                                                                                | 56                                                 | 45.6                                   | 10        |
| NiFeRu-LDH                                                                           | 29                                                 | 31                                     | 11        |
| NiVRu-LDH                                                                            | 12                                                 | 40                                     | 12        |
| Ni <sub>3</sub> N@CQDs                                                               | 69                                                 | 104                                    | 13        |
| CoNiP                                                                                | 58                                                 | 57                                     | 14        |
| CoP/NCNHP                                                                            | 115                                                | 66                                     | 15        |
| MoS <sub>2</sub> /Co <sub>9</sub> S <sub>8</sub> /Ni <sub>3</sub> S <sub>2</sub> /Ni | 113                                                | 85                                     | 16        |
| Ni-Ni <sub>3</sub> C                                                                 | 98                                                 | 88.5                                   | 17        |
| Co-NiS <sub>2</sub>                                                                  | 80                                                 | 43                                     | 18        |
| Ni-Ni(OH) <sub>2</sub>                                                               | 57                                                 | 44.8                                   | 19        |
| Ni-V <sub>2</sub> O <sub>3</sub>                                                     | 61                                                 | 79.7                                   | 20        |
| Ni-MoS <sub>2</sub>                                                                  | 98                                                 | 103                                    | 21        |
| Ni NP Ni-N-C                                                                         | 147                                                | 114                                    | 22        |
| WMo-NG                                                                               | 67                                                 | 45                                     | 23        |
| Mo <sub>2</sub> N-Mo <sub>2</sub> C                                                  | 154                                                | 68                                     | 24        |
| Ni <sub>3</sub> S <sub>2</sub> @BL MoS <sub>2</sub>                                  | 78.1                                               | 53.4                                   | 25        |
| Fe-MoS <sub>2</sub> /CoMo <sub>2</sub> S <sub>4</sub>                                | 122                                                | 90                                     | 26        |
| Co <sub>9</sub> S <sub>8</sub> -MoS <sub>2</sub>                                     | 167                                                | 81.7                                   | 27        |
| MoS <sub>2</sub> /Fe <sub>5</sub> Ni <sub>4</sub> S                                  | 122                                                | 45.1                                   | 28        |
| MoS <sub>2</sub> /Ni <sub>2</sub> O <sub>3</sub> H                                   | 84                                                 | 82.3                                   | 29        |

| Electrocatalysts                         | Overpotential at<br>10 mA cm <sup>-2</sup><br>(mV) | Tafel slope<br>(mV dec <sup>-1</sup> ) | Ref. |
|------------------------------------------|----------------------------------------------------|----------------------------------------|------|
| H-MoS <sub>2</sub> /MoP                  | 92                                                 | 59.8                                   | 30   |
| Mo <sub>2</sub> N-MoS <sub>2</sub> MCNFs | 131                                                | 68.9                                   | 31   |
| D-MoS <sub>2</sub> /NiS <sub>2</sub>     | 62                                                 | 50.1                                   | 32   |
| CoP/MoS <sub>2</sub>                     | 77                                                 | 58                                     | 33   |
| R-MoS <sub>2</sub> @NF                   | 71                                                 | 100                                    | 34   |
| Ni-MoS <sub>2</sub>                      | 98                                                 | 60                                     | 35   |
| Co-O-1T-MoS <sub>2</sub> /SWNT           | 113                                                | 50                                     | 36   |
| 2D-MoS <sub>2</sub> /Co(OH)              | 128                                                | 76                                     | 37   |

**Table S2.** HER activities of the reported electrocatalysts in 1 M KOH.

| Electrocatalysts                   | Overpotential at<br>100 mA cm <sup>-2</sup><br>(mV) | Tafel slope<br>(mV dec <sup>-1</sup> ) | Ref. |
|------------------------------------|-----------------------------------------------------|----------------------------------------|------|
| MoO <sub>3</sub> /Ni-NiO/CC        | 162                                                 | 59                                     | 38   |
| NiMoN/CC                           | ~168                                                | 95                                     | 39   |
| Ni <sub>2</sub> P/NF               | ~175                                                | 76                                     | 40   |
| Co/MoN/NF                          | 179                                                 | 77.5                                   | 41   |
| Ni-Ni <sub>4</sub> N               | 193                                                 | 118.1                                  | 9    |
| Ni <sub>3</sub> N-VN/NF            | 218                                                 | 37                                     | 42   |
| Ni-Mo-N/CFC                        | ~250                                                | 70                                     | 43   |
| Co-Ni <sub>3</sub> N/CC            | ~285                                                | 156                                    | 44   |
| Pt <sub>ads</sub> @WC <sub>X</sub> | 297                                                 | 53                                     | 9    |

Table S3. Electrochemical stability tests of the reported electrocatalysts in 1 M KOH.

| Electrocatalysts          | Test conditions         | Test time (h) | Ref.      |
|---------------------------|-------------------------|---------------|-----------|
| Mo-TiNi <sub>3</sub> -10% | 100 mA cm <sup>-2</sup> | 48            | This work |
| Ni-SA/NC                  | 200 mv                  | 14            | 45        |
| D15h HEI                  | 100 mA cm <sup>-2</sup> | 40            | 46        |
| Pi-CoP                    | 10 mA cm <sup>-2</sup>  | 20            | 47        |
| Ni-SN@C                   | 25 mV                   | 40            | 48        |
| CoNi-inf                  | 10 mA cm <sup>-2</sup>  | 14            | 49        |
| Co-Pd-MoS <sub>2</sub>    | 49.3 mV                 | 32            | 50        |
| Ir/VC/C-100               | 10 mA cm <sup>-2</sup>  | 10            | 51        |
| CoMoCH@NiCoP/NF           | 100 mv                  | 50            | 52        |
| SnTPPCOP                  | 147 mV                  | 10            | 53        |
| 1.0Ru@Ni <sub>3</sub> B   | 10 mA cm <sup>-2</sup>  | 24            | 54        |

## References

1. G. Kresse and J. Hafner, *Phys. Rev. B*, 1993, 47, 558.
2. G. Kresse and J. Furthmüller, *Phys. Rev. B*, 1996, 54, 11169.
3. G. Kresse and J. Furthmüller, *Comput. Mater. Sci.*, 1996, 6, 15-50.
4. G. Kresse and D. Joubert, *Phys. Rev. B*, 1999, 59, 1758.
5. K. Momma and F. Izumi, *J. Appl. Crystallogr.*, 2011, 44, 1272-1276.
6. Y. Ji, H. Dong, C. Liu and Y. Li, *Nanoscale*, 2019, 11, 454-458.
7. Q. He, D. Tian, H. Jiang, D. Cao, S. Wei, D. Liu, P. Song, Y. Lin and L. Song, *Adv. Mater.*, 2020, 32, 1906972.
8. Y. Liu, S. Liu, Y. Wang, Q. Zhang, L. Gu, S. Zhao, D. Xu, Y. Li, J. Bao and Z. Dai, *J. Am. Chem. Soc.*, 2018, 140, 2731-2734.
9. X. Chen, J. Wan, J. Wang, Q. Zhang, L. Gu, L. Zheng, N. Wang and R. Yu, *Adv. Mater.*, 2021, 33, 2104764.
10. L. Yu, Q. Zhu, S. Song, B. McElhenny, D. Wang, C. Wu, Z. Qin, J. Bao, Y. Yu and S. Chen, *Nat. Commun.*, 2019, 10, 1-10.
11. G. Chen, T. Wang, J. Zhang, P. Liu, H. Sun, X. Zhuang, M. Chen and X. Feng, *Adv. Mater.*, 2018, 30, 1706279.
12. D. Wang, Q. Li, C. Han, Q. Lu, Z. Xing and X. Yang, *Nat. Commun.*, 2019, 10, 3899.
13. M. Zhou, Q. Weng, Z. I. Popov, Y. Yang, L. Y. Antipina, P. B. Sorokin, X. Wang, Y. Bando and D. Golberg, *ACS nano*, 2018, 12, 4148-4155.
14. Z. Fang, L. Peng, Y. Qian, X. Zhang, Y. Xie, J. J. Cha and G. Yu, *J. Am. Chem. Soc.*, 2018, 140, 5241-5247.
15. Y. Pan, K. Sun, S. Liu, X. Cao, K. Wu, W.-C. Cheong, Z. Chen, Y. Wang, Y. Li and Y. Liu, *J. Am. Chem. Soc.*, 2018, 140, 2610-2618.
16. Y. Yang, H. Yao, Z. Yu, S. M. Islam, H. He, M. Yuan, Y. Yue, K. Xu, W. Hao and G. Sun, *J. Am. Chem. Soc.*, 2019, 141, 10417-10430.
17. P. Wang, R. Qin, P. Ji, Z. Pu, J. Zhu, C. Lin, Y. Zhao, H. Tang, W. Li and S. Mu, *Small*, 2020, 16, 2001642.

18. J. Yin, J. Jin, H. Zhang, M. Lu, Y. Peng, B. Huang, P. Xi and C. H. Yan, *Angew. Chem. Int. Ed.*, 2019, 131, 18849-18855.
19. J. Hu, S. Li, Y. Li, J. Wang, Y. Du, Z. Li, X. Han, J. Sun and P. Xu, *J. Mater. Chem. A*, 2020, 8, 23323-23329.
20. M. Ming, Y. Ma, Y. Zhang, L.-B. Huang, L. Zhao, Y.-Y. Chen, X. Zhang, G. Fan and J.-S. Hu, *J. Mater. Chem. A*, 2018, 6, 21452-21457.
21. Q. Wang, Z. L. Zhao, S. Dong, D. He, M. J. Lawrence, S. Han, C. Cai, S. Xiang, P. Rodriguez and B. Xiang, *Nano Energy*, 2018, 53, 458-467.
22. C. Lei, Y. Wang, Y. Hou, P. Liu, J. Yang, T. Zhang, X. Zhuang, M. Chen, B. Yang and L. Lei, *Energy Environ. Sci.*, 2019, 12, 149-156.
23. Y. Yang, Y. Qian, H. Li, Z. Zhang, Y. Mu, D. Do, B. Zhou, J. Dong, W. Yan and Y. Qin, *Sci. Adv.*, 2020, 6, eaba6586.
24. H. Yan, Y. Xie, Y. Jiao, A. Wu, C. Tian, X. Zhang, L. Wang and H. Fu, *Adv. Mater.*, 2018, 30, 1704156.
25. T. Zhang, Y. Liu, J. Yu, Q. Ye, L. Yang, Y. Li and H. J. Fan, *Adv. Mater.*, 2022, 2202195.
26. Y. Guo, J. Tang, J. Henzie, B. Jiang, W. Xia, T. Chen, Y. Bando, Y.-M. Kang, M. S. A. Hossain and Y. Sugahara, *ACS nano*, 2020, 14, 4141-4152.
27. M. Kim, M. A. R. Anjum, M. Choi, H. Y. Jeong, S. H. Choi, N. Park and J. S. Lee, *Adv. Funct. Mater.*, 2020, 30, 2002536.
28. Y. Wu, F. Li, W. Chen, Q. Xiang, Y. Ma, H. Zhu, P. Tao, C. Song, W. Shang and T. Deng, *Adv. Mater.*, 2018, 30, 1803151.
29. J. Hu, C. Zhang, Y. Zhang, B. Yang, Q. Qi, M. Sun, F. Zi, M. K. Leung and B. Huang, *Small*, 2020, 16, 2002212.
30. Q. Liu, Z. Xue, B. Jia, Q. Liu, K. Liu, Y. Lin, M. Liu, Y. Li and G. Li, *Small*, 2020, 16, 2002482.
31. D. Xie, G. Yang, D. Yu, Y. Hao, S. Han, Y. Cheng, F. Hu, L. Li, H. Wei and C. Ji, *ACS Sustainable Chem. Eng.*, 2020, 8, 14179-14189.
32. J. Lin, P. Wang, H. Wang, C. Li, X. Si, J. Qi, J. Cao, Z. Zhong, W. Fei and J. Feng, *Adv. Sci.*, 2019, 6, 1900246.

33. Y. Ge, H. Chu, J. Chen, P. Zhuang, Q. Feng, W. R. Smith, P. Dong, M. Ye and J. Shen, *ACS Sustainable Chem. Eng.*, 2019, 7, 10105-10111.
34. M. A. R. Anjum, H. Y. Jeong, M. H. Lee, H. S. Shin and J. S. Lee, *Adv. Mater.*, 2018, 30, 1707105.
35. J. Zhang, T. Wang, P. Liu, S. Liu, R. Dong, X. Zhuang, M. Chen and X. Feng, *Energy Environ. Sci.*, 2016, 9, 2789-2793.
36. D. Cao, K. Ye, O. A. Moses, W. Xu, D. Liu, P. Song, C. Wu, C. Wang, S. Ding and S. Chen, *ACS nano*, 2019, 13, 11733-11740.
37. Z. Zhu, H. Yin, C. T. He, M. Al - Mamun, P. Liu, L. Jiang, Y. Zhao, Y. Wang, H. G. Yang and Z. Tang, *Adv. Mater.*, 2018, 30, 1801171.
38. X. Xiao, X. Wang, B. Li, X. Jiang, Y. Zhang, M. Li, S. Song, S. Chen, M. Wang, Y. Shen and Z. Ren, *Mater. Today Phys.*, 2020, 12, 100182.
39. Y. Zhang, B. Ouyang, J. Xu, S. Chen, R. S. Rawat and H. J. Fan, *Adv. Energy Mater.*, 2016, 6, 1600221.
40. X. Yu, Z.-Y. Yu, X.-L. Zhang, Y.-R. Zheng, Y. Duan, Q. Gao, R. Wu, B. Sun, M.-R. Gao, G. Wang and S.-H. Yu, *J. Am. Chem. Soc.*, 2019, 141, 7537-7543.
41. J. Sun, W. Xu, C. Lv, L. Zhang, M. Shakouri, Y. Peng, Q. Wang, X. Yang, D. Yuan, M. Huang, Y. Hu, D. Yang and L. Zhang, *Appl. Catal., B*, 2021, 286, 119882.
42. H. Yan, Y. Xie, A. Wu, Z. Cai, L. Wang, C. Tian, X. Zhang and H. Fu, *Adv. Mater.*, 2019, 31, 1901174.
43. Y. Li, X. Wei, L. Chen, J. Shi and M. He, *Nat. Commun.*, 2019, 10, 5335.
44. C. Zhu, A.-L. Wang, W. Xiao, D. Chao, X. Zhang, N. H. Tiep, S. Chen, J. Kang, X. Wang, J. Ding, J. Wang, H. Zhang and H. J. Fan, *Adv. Mater.*, 2018, 30, 1705516.
45. W. Zang, T. Sun, T. Yang, S. Xi, M. Waqar, Z. Kou, Z. Lyu, Y. P. Feng, J. Wang and S. J. Pennycook, *Advanced Materials*, 2021, 33, 2003846.
46. Z. Jia, T. Yang, L. Sun, Y. Zhao, W. Li, J. Luan, F. Lyu, L. C. Zhang, J. J. Kruzic and J. J. Kai, *Advanced Materials*, 2020, 32, 2000385.
47. D. Zhu, L. Wang, M. Qiao and J. Liu, *Chemical Communications*, 2020, 56, 7159-7162.
48. H. Jin, X. Wang, C. Tang, A. Vasileff, L. Li, A. Slattery and S. Z. Qiao, *Advanced Materials*, 2021, 33, 2007508.

49. X. Tan, S. Geng, Y. Ji, Q. Shao, T. Zhu, P. Wang, Y. Li and X. Huang, *Advanced Materials*, 2020, 32, 2002857.
50. W. Yang, S. Zhang, Q. Chen, C. Zhang, Y. Wei, H. Jiang, Y. Lin, M. Zhao, Q. He and X. Wang, *Advanced Materials*, 2020, 32, 2001167.
51. P. Wu, J. Li, Z. Xiao, Y. Zhao, Y. Wang, B. Xiao and B. Huang, *Chemical Communications*, 2021, 57, 10395-10398.
52. D. Guo, H. Chen, H. Tian, S. Ouyang, J. Wang and J. Lv, *Chemical Communications*, 2020, 56, 4990-4993.
53. Q. Wang, A. Wang, Y. Dou, X. Shen, M. S. Sudi, L. Zhao, W. Zhu and L. Li, *Chemical Communications*, 2022, 58, 7423-7426.
54. J. Yao, X. Zhong, T. Lu and Y. Pan, *Chemical Communications*, 2022, 58, 6741-6744.
